# Supplementary material for: Construction of a ceRNA Network and Comprehensive Analysis of lncRNA in Hepatocellular Carcinoma
Source: MDPI journal article supplement (doi:10.3390/genes13050785), 2022-04-28
Supplement: s1 [file s1]

**Table S1.** The top 15 upregulated and downregulated DEmRNAs with their log2FC values and P-values.

| Genes         | logFC        | logCPM      | PValue   |
|---------------|--------------|-------------|----------|
| RP11-301L7.1  | 5.664809245  | 4.474145013 | 2.56E-22 |
| RP11-909N17.3 | 5.586511692  | 4.400139912 | 2.80E-25 |
| RP11-909N17.2 | 5.58651169   | 4.400139912 | 2.80E-25 |
| AC079466.1    | 5.58453638   | 4.470629975 | 1.48E-19 |
| SFN           | 5.448891744  | 5.14188419  | 1.13E-40 |
| PGC           | 5.353119157  | 4.473454457 | 2.85E-19 |
| MEP1A         | 5.290961895  | 4.012896379 | 3.70E-23 |
| TGM3          | 5.192998419  | 4.544307211 | 4.83E-22 |
| UPK3A         | 5.120539857  | 4.418173862 | 5.44E-22 |
| CPLX2         | 4.990621414  | 4.362845781 | 5.31E-19 |
| DUSP9         | 4.982415126  | 5.068947585 | 1.12E-33 |
| GNG4          | 4.915973021  | 4.024800287 | 8.09E-22 |
| AC073236.3    | 4.841904755  | 4.417417615 | 4.52E-16 |
| DKK1          | 4.829706035  | 4.754734194 | 2.50E-19 |
| CDC20         | 4.78672941   | 5.383990668 | 2.47E-81 |
| CNDP1         | -4.211023785 | 5.337137303 | 8.38E-48 |
| RP11-701P16.4 | -4.464106711 | 5.532701379 | 3.70E-53 |
| NAT2          | -4.35720821  | 5.921805802 | 5.65E-92 |
| IDO2          | -4.492025009 | 5.462556919 | 3.63E-42 |
| FCN2          | -4.802037343 | 5.690365256 | 3.90E-75 |
| RP11-263F14.3 | -4.802037422 | 5.690365256 | 3.90E-75 |
| CLEC4M        | -5.223075185 | 5.970627467 | 9.05E-60 |
| CLEC4G        | -3.985054141 | 6.076026818 | 2.15E-26 |
| FCN3          | -4.171762122 | 6.824659519 | 1.18E-53 |
| CRHBP         | -4.144477327 | 5.867305151 | 3.98E-53 |
| KCNN2         | -4.123260098 | 4.197185421 | 5.33E-55 |
| CYP26A1       | -4.155810072 | 4.435021946 | 1.61E-36 |
| COLEC10       | -4.031480792 | 4.830046023 | 6.91E-80 |
| CLEC1B        | -4.68008381  | 4.736052355 | 2.39E-90 |
| GDF2          | -4.400937357 | 3.817374684 | 1.67E-57 |

**Table S2.** Primers used in this study.

| Name              | Sequence (5'- 3')         |
|-------------------|---------------------------|
| miR-22-5p-F1      | AACAAGAGTTCTTCAGTGGCAAGC  |
| miR100-5p-F1:     | AACAAGAACCCGTAGATCCGAACTT |
| miR-107-F1:       | AACACGCAGCAGCATTGTACAG    |
| miR148a-5p-F1:    | AACAAGAAAGTTCTGAGACACTCCG |
| LINC01184-forward | GCAAGCGGTCTTCTCTGTCT      |
| LINC01184-reverse | GTCTCCTGTTCGTGTCAGCA      |

**Table S3.** The mRNAs targeted to the 8 miRNAs

| miRNA    | Targeted mRNA |
|----------|---------------|
| miR-22   | BUB1B, ESR1   |
| miR-100  | ESR1, RRM2    |
| miR-107  | CDK1          |
| miR-148a | KIF2C         |
| miR-106a | RRM2, BUB1    |
| miR-149  | RRM2          |
| miR-188  | CDC20, CDCA8  |
| miR-215  | TTK           |

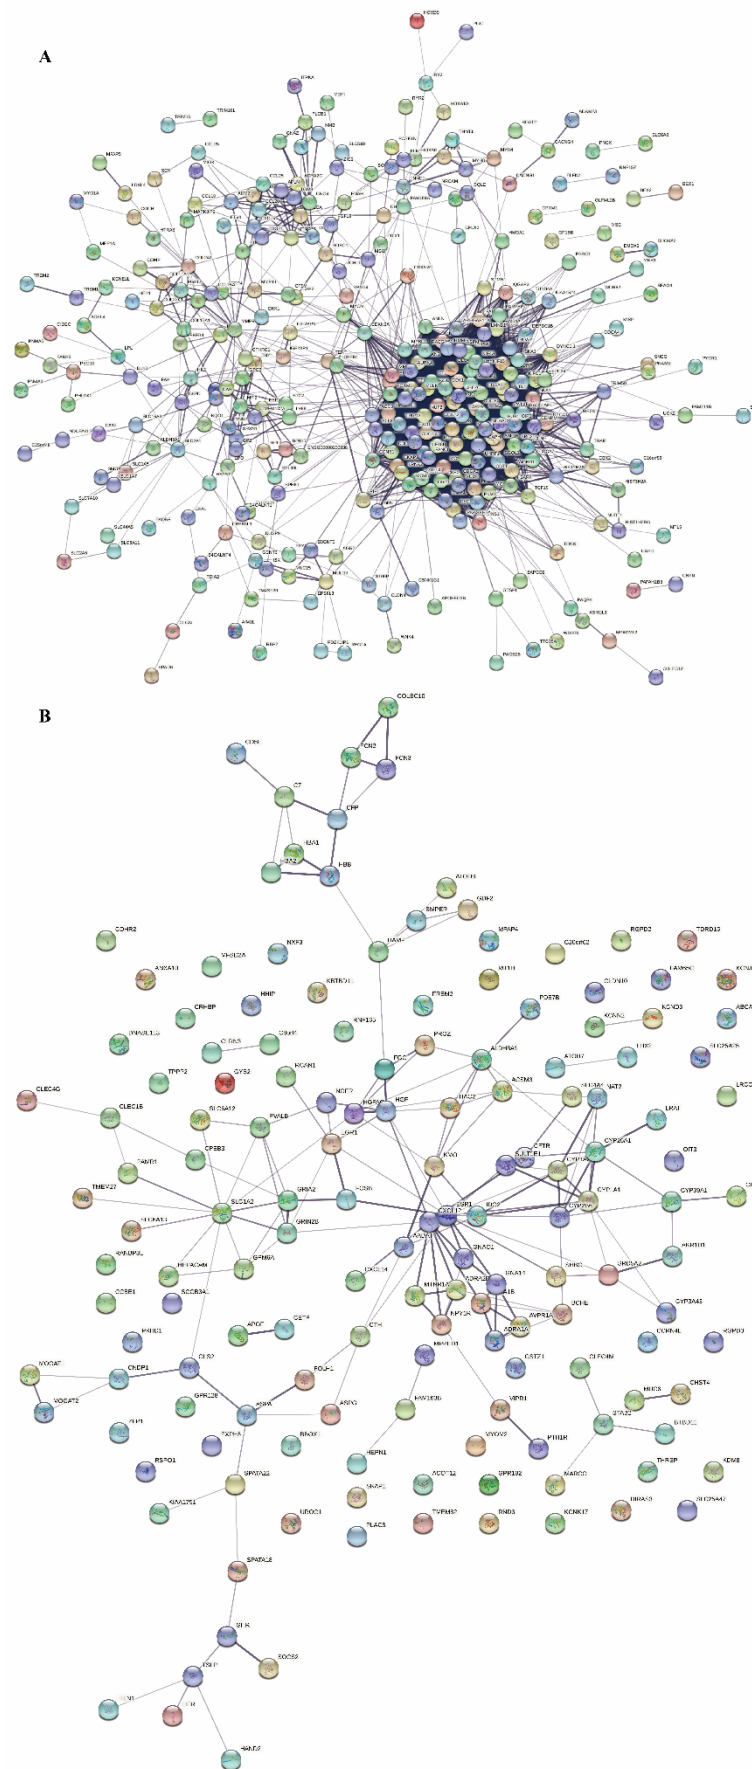

**Figure S1.** The PPI network pictures. (A) The PPI network of the significant upregulated DEGs.

(B) The PPI network of the significant downregulated DEGs.
